# Supplementary material
Source: PubMed Central journal article supplement (PMC4811029)
Supplement: NIHMS768088-supplement-supplement_1.pdf [file NIHMS768088-supplement-supplement_1.pdf]

| <b>eTable 5. Michelson Withdrawal Symptom Scale Scores, by Random Assignment</b>                                                                           |                        |             |
|------------------------------------------------------------------------------------------------------------------------------------------------------------|------------------------|-------------|
|                                                                                                                                                            |                        |             |
| Cycle of Participation                                                                                                                                     | Active                 | Placebo     |
| Cycle 1                                                                                                                                                    | 72.9 (29.3)            | 68.1 (25.4) |
| Cycle 2                                                                                                                                                    | 73.4 (29.9)            | 75.2 (33.1) |
| Cycle 3                                                                                                                                                    | 70.3 (27.9)            | 71.7 (39.0) |
| Cycle 4                                                                                                                                                    | 62.3 (25.1)            | 65.4 (25.3) |
| Cycle 5                                                                                                                                                    | 63.9 (19.9)            | 62.1 (24.0) |
| Cycle 6                                                                                                                                                    | 67.5 (22.1)            | 76.2 (34.1) |
| Main Group Effect                                                                                                                                          | F(1,209)=0.55, p=0.46  |             |
| Time slope                                                                                                                                                 | F(6,631)=6.41, p<0.001 |             |
| Group by Time Effect                                                                                                                                       | F(6,640)=0.65, p=0.69  |             |
| Estimated Mean difference from baseline to end point between active vs. placebo (95% CI)                                                                   | 1.02 (0.83 – 1.26)     |             |
| <p>The 16-item Michelson Withdrawal was collected prospectively during the 3 days after pills were discontinued. Scores were summed across the 3 days.</p> |                        |             |

| <b>eTable 6. Adverse Events by Random Assignment</b> |                   |                    |            |              |
|------------------------------------------------------|-------------------|--------------------|------------|--------------|
|                                                      | Active<br>(n=125) | Placebo<br>(n=127) | Difference | Significance |
| Nausea                                               | 35                | 15                 | 20         | <0.001       |
| Diarrhea                                             | 22                | 14                 | 8          | 0.18         |
| Headache                                             | 14                | 19                 | 5          | 0.38         |
| Insomnia                                             | 22                | 9                  | 13         | 0.02         |
| Fatigue                                              | 15                | 14                 | 1          | 0.85         |
| Mouth dryness                                        | 13                | 5                  | 8          | 0.06         |
| Difficulty concentrating                             | 8                 | 9                  | 1          | 0.81         |
| Anxiety, agitation                                   | 10                | 6                  | 4          | 0.32         |
| Diaphoresis                                          | 6                 | 10                 | 4          | 0.32         |
| Dizziness/lightheadedness                            | 9                 | 6                  | 3          | 0.44         |
|                                                      |                   |                    |            |              |
